# Supplementary material
Source: publisher site journal article supplement (http://www.oncotarget.com/documents/wos_commentary.docx)
Supplement: Supplementary file 1 [file wos_commentary.docx]

Commentary on Clarivate decision:

So according to the letter, Oncotarget was delisted without clear reasons. Also unclear is whether the journal was delisted despite being the best journal (according to Web of Science’s [own evaluation in October](https://clarivate.com/blog/science-research-connect/rising-stars-essential-science-indicators/)), or because it is the best journal, yet remains independent. [See Editorial](http://www.oncotarget.com/oncotarget/index.php?journal=oncotarget&page=article&op=view&path%5B%5D=24272)

But even if Oncotarget were not named as the best journal, valid reasons for it being delisted should be stated. Instead, the letter says only that, **“journals move in and out of the list.” In other words, the delisting was arbitrary**. Most of Web of Science journals have an IF below 1. Why were these journals not delisted? As a result of the delisting, IFs of other journals will become unreliable. The decision hurts scientists, most especially the authors. Our Editorial Board strongly disagrees with this decision, as do most scientists.
